# Supplementary material
Source: publisher site journal article supplement (https://www.dovepress.com/article/106288)
Supplement: Supplementary file 1 [file get_supplementary_file.php]

**Supplementary Table 1.** Demographics for all study subjects

**Supplementary Table 1a.** Patient characteristics of the plasma samples obtained on a clinical trial (week 3) consisting of interferon alfa and bortezomib.

|                                    |            |
|------------------------------------|------------|
| <b>Melanoma patients chip 1</b>    | 12         |
| <b>Sex (n)</b>                     |            |
| Male                               | 5          |
| Female                             | 7          |
| <b>Age (years)</b>                 |            |
| Mean                               | 59.8       |
| Median                             | 59         |
| Range                              | 40-82      |
| <b>Tumor extent</b>                | Metastatic |
| <b>ECOG Performance Status (n)</b> |            |
| 0                                  | 2          |
| 1                                  | 8          |
| ≥2                                 | 1          |
| Unknown                            | 1          |
| <b>% Lysis</b>                     | 33%        |

**Supplementary Table Table 1b.** Patient characteristics of the plasma samples obtained from the metastatic melanoma patients utilized for chip 2.

|                                           |            |
|-------------------------------------------|------------|
| <b>Number of melanoma patients chip 2</b> | 9          |
| <b>Sex (n)</b>                            |            |
| Male                                      | 7          |
| Female                                    | 2          |
| <b>Age (years)</b>                        |            |
| Mean                                      | 51.7       |
| Median                                    | 54         |
| Range                                     | 28-66      |
| <b>Tumor extent</b>                       | Metastatic |
| <b>ECOG Performance Status (n)</b>        |            |
| 0                                         | 6          |
| 1                                         | 0          |
| ≥2                                        | 3          |
| <b>% Lysis</b>                            | 11%        |

**Supplementary Table 1c. Patient characteristics of the plasma samples obtained from the metastatic pancreatic cancer patients utilized for chip 3.**

|                                                     |            |
|-----------------------------------------------------|------------|
| <b>Number of pancreatic adenocarcinoma patients</b> | 10         |
| <b>Sex (n)</b>                                      |            |
| Male                                                | 8          |
| Female                                              | 2          |
| <b>Age (years)</b>                                  |            |
| Mean                                                | 62.5       |
| Median                                              | 61         |
| Range                                               | 49-85      |
| <b>Tumor extent</b>                                 | Metastatic |
| <b>ECOG Performance Status (n)</b>                  |            |
| 0                                                   | 2          |
| 1                                                   | 4          |
| ≥2                                                  | 4          |
| <b>% Lysis</b>                                      | 20%        |

**Supplementary Table 1d. Patient characteristics of the plasma samples obtained from the normal donor controls utilized for chips 2 and 3.**

|                                    |       |
|------------------------------------|-------|
| <b>Number of normal donors</b>     | 8     |
| <b>Sex (n)</b>                     |       |
| Male                               | 5     |
| Female                             | 3     |
| <b>Age (years)</b>                 |       |
| Mean                               | 54.25 |
| Median                             | 55.5  |
| Range                              | 42-64 |
| <b>ECOG Performance Status (n)</b> |       |
| 0                                  | 8     |
| <b>% Lysis</b>                     | 0%    |

**Supplementary Table 2. Differentially expressed miRNA obtained from the biostatistical analysis.**

| miRNA                           | Fold Change | P value     |
|---------------------------------|-------------|-------------|
| hsa-miR-223-3p                  | 78.31444546 | 1.02919E-07 |
| hsa-miR-19b-3p                  | 5.777404453 | 2.18294E-07 |
| hsa-miR-126-3p                  | 16.60968643 | 3.62074E-07 |
| hsa-miR-23a-3p                  | 11.72551768 | 4.37262E-07 |
| hsa-miR-130a-3p                 | 8.09982842  | 7.1817E-07  |
| hsa-let-7b-5p                   | 8.611618329 | 9.60522E-07 |
| hsa-miR-142-3p                  | 15.14156245 | 1.83951E-06 |
| hsa-miR-15b-5p                  | 9.321648467 | 2.0771E-06  |
| hsa-miR-93-5p                   | 7.720855371 | 2.3533E-06  |
| hsa-let-7g-5p                   | 9.952747709 | 2.64849E-06 |
| hsa-miR-92a-3p                  | 5.63490397  | 2.87819E-06 |
| hsa-miR-22-3p                   | 6.20683798  | 3.34986E-06 |
| hsa-let-7a-5p                   | 14.68266033 | 3.60255E-06 |
| hsa-miR-199a-3p+hsa-miR-199b-3p | 12.20891763 | 3.9669E-06  |
| hsa-miR-146a-5p                 | 17.7863772  | 4.19303E-06 |
| hsa-let-7i-5p                   | 10.76293169 | 4.85896E-06 |
| hsa-miR-191-5p                  | 10.86982455 | 6.60136E-06 |
| hsa-miR-106a-5p+hsa-miR-17-5p   | 8.223833947 | 8.25129E-06 |
| hsa-miR-20a-5p+hsa-miR-20b-5p   | 8.298595423 | 1.98462E-05 |
| hsa-miR-423-5p                  | 7.202414489 | 2.73255E-05 |
| hsa-miR-374a-5p                 | 2.478246674 | 7.1979E-05  |
| hsa-miR-24-3p                   | 6.049221986 | 7.22744E-05 |
| hsa-miR-181a-5p                 | 4.891786887 | 9.93639E-05 |
| hsa-miR-484                     | 3.645089454 | 0.000105172 |
| hsa-miR-151a-3p                 | 3.111650881 | 0.00011191  |
| hsa-miR-4454                    | 16.14557335 | 0.000112769 |
| hsa-miR-631                     | 0.556920222 | 0.000113117 |
| hsa-miR-19a-3p                  | 3.267187468 | 0.000173836 |
| hsa-let-7d-5p                   | 5.257483016 | 0.000198868 |
| hsa-miR-16-5p                   | 5.680377558 | 0.000209305 |
| hsa-miR-15a-5p                  | 4.043476414 | 0.00026657  |
| hsa-miR-148a-3p                 | 2.967184544 | 0.000289513 |
| hsa-miR-361-5p                  | 3.039328937 | 0.00029006  |
| hsa-miR-221-3p                  | 4.371017407 | 0.00031459  |
| hsa-miR-1200                    | 0.522062435 | 0.000412964 |
| hsa-miR-548al                   | 0.447790037 | 0.000455004 |
| hsa-miR-140-5p                  | 1.593480701 | 0.000466602 |
| hsa-miR-720                     | 5.768829359 | 0.000501241 |
| hsa-miR-891a                    | 0.517583099 | 0.000677765 |

|                            |             |             |
|----------------------------|-------------|-------------|
| hsa-miR-26a-5p             | 3.453952496 | 0.000678893 |
| hsa-miR-148b-3p            | 1.867422682 | 0.000785126 |
| hsa-miR-29a-3p             | 3.330643042 | 0.001029677 |
| hsa-miR-1245b-5p           | 0.570388058 | 0.001874672 |
| hsa-miR-548n               | 0.493636078 | 0.002915744 |
| hsa-miR-188-5p             | 0.512100462 | 0.003045036 |
| hsa-miR-328                | 2.172341194 | 0.003195606 |
| hsa-miR-548u               | 0.574072789 | 0.003304015 |
| hsa-miR-4443               | 0.452168384 | 0.003348023 |
| hsa-miR-1183               | 0.441434486 | 0.003575194 |
| hsa-miR-155-5p             | 0.612536829 | 0.003782074 |
| hsa-miR-197-3p             | 2.434743175 | 0.004152169 |
| Chip 2<br>hsa-miR-494      | 0.675507    | 0.00015296  |
| Chip 3<br>hsa-miR 1245b-3p | 1.307915    | 0.000704    |
| hsa-miR-1268a              | 0.729109    | 0.001415    |

**Supplementary Table 3. Differentially expressed miRNA obtained from the rank-based bioinformatics analysis.**

| Up-regulated                                                                                                                                                                                                                                                                                                                                                                                                                                                                                                                                                                                                                                  | Down-regulated                                                                                                                                                                                                                                                      |
|-----------------------------------------------------------------------------------------------------------------------------------------------------------------------------------------------------------------------------------------------------------------------------------------------------------------------------------------------------------------------------------------------------------------------------------------------------------------------------------------------------------------------------------------------------------------------------------------------------------------------------------------------|---------------------------------------------------------------------------------------------------------------------------------------------------------------------------------------------------------------------------------------------------------------------|
| Chip 1<br>hsa-miR-146a-5p<br>hsa-miR-151a-3p<br>hsa-miR-22-3p<br>hsa-let-7a-5p<br>hsa-miR-140-5p<br>hsa-miR-199a-3p+hsa-miR-199b-3p<br>hsa-miR-361-5p<br>hsa-miR-23a-3p<br>hsa-miR-24-3p<br>hsa-miR-29a-3p<br>hsa-miR-106a-5p+hsa-miR-17-5p<br>hsa-let-7i-5p<br>hsa-miR-148a-3p<br>hsa-miR-221-3p<br>hsa-miR-191-5p<br>hsa-let-7d-5p<br>hsa-miR-15b-5p<br>hsa-miR-93-5p<br>hsa-miR-15a-5p<br>hsa-miR-92a-3p<br>hsa-miR-130a-3p<br>hsa-miR-181a-5p<br>hsa-miR-20a-5p+hsa-miR-20b-5p<br>hsa-miR-19b-3p<br>hsa-let-7b-5p<br>hsa-miR-484<br>hsa-miR-126-3p<br>hsa-miR-423-5p<br>hsa-miR-26a-5p<br>hsa-miR-16-5p<br>hsa-let-7g-5p<br>hsa-let-7d-5p | Chip 1<br>hsa-miR-548q<br>hsa-miR-548d-3p<br>hsa-miR-4443<br>hsa-miR-520h<br>hsa-miR-518b<br>hsa-miR-612<br>hsa-miR-363-3p<br>hsa-miR-631<br>hsa-miR-548a-5p<br>hsa-miR-888-5p<br>hsa-miR-188-5p<br>hsa-miR-219-5p<br>hsa-miR-1827<br>hsa-miR-1183<br>hsa-miR-548al |
| Chip 2<br>hsa-miR-16-5p<br>hsa-let-7e-5p<br>hsa-miR-27a-3p                                                                                                                                                                                                                                                                                                                                                                                                                                                                                                                                                                                    | Chip 2<br>hsa-miR-409-3p                                                                                                                                                                                                                                            |
| Chip 3<br>hsa-miR-3127-5p                                                                                                                                                                                                                                                                                                                                                                                                                                                                                                                                                                                                                     | Chip 3<br>hsa-miR-1245b-3p                                                                                                                                                                                                                                          |

**Supplementary Table 4. False positive rates for a chip consisting of 7 patient plasma samples and 4 normal donor controls.**

| %  | Up-regulated | Down- regulated |
|----|--------------|-----------------|
| 5  | 5.09E-07     | 0.00349169      |
| 10 | 5.25E-05     | 0.03826375      |
| 15 | 0.00071352   | 0.1298337       |
| 20 | 0.0041943    | 0.2684355       |
| 25 | 0.01544952   | 0.4171371       |
| 30 | 0.0420079    | 0.5336559       |
| 35 | 0.09187973   | 0.5885125       |
| 40 | 0.1698693    | 0.5733089       |
| 45 | 0.2735447    | 0.4994349       |
| 50 | 0.390625     | 0.390625        |
| 55 | 0.4994349    | 0.2735447       |
| 60 | 0.5733089    | 0.1698693       |
| 65 | 0.5885125    | 0.09187973      |
| 70 | 0.5336559    | 0.0420079       |
| 75 | 0.4171371    | 0.01544952      |
| 80 | 0.2684355    | 0.0041943       |
| 85 | 0.1298337    | 0.00071352      |
| 90 | 0.03826375   | 5.25E-05        |
| 95 | 0.00349169   | 5.09E-07        |

**Supplementary Table 5. False positive rates for a chip consisting of 8 patient plasma samples and 4 normal donor controls.**

|     | Up-regulated | Down-regulated |
|-----|--------------|----------------|
| 5%  | 2.55E-08     | 3.32E-03       |
| 10% | 5.25E-06     | 3.44E-02       |
| 15% | 0.000107028  | 0.1103587      |
| 20% | 0.000838861  | 0.2147484      |
| 25% | 0.003862381  | 0.3128529      |
| 30% | 0.01260237   | 0.3735591      |
| 35% | 0.03215791   | 0.3825331      |
| 40% | 0.06794772   | 0.3439854      |
| 45% | 0.1230951    | 0.2746892      |
| 50% | 0.1953125    | 0.1953125      |
| 55% | 0.2746892    | 0.1230951      |
| 60% | 0.3439854    | 0.06794772     |
| 65% | 0.3825331    | 0.03215791     |
| 70% | 0.3735591    | 0.01260237     |
| 75% | 0.3128529    | 0.003862381    |
| 80% | 0.2147484    | 0.000838861    |
| 85% | 0.1103587    | 0.000107028    |
| 90% | 0.03443738   | 5.25E-06       |
| 95% | 0.003317102  | 2.55E-08       |

**Supplementary Table 6. Principal Component analysis**

| Chip | Eigenvalue of Component 1 | Eigenvalue of Component 2 | Eigenvalue of Component 3 | Eigenvalue of Component 4 |
|------|---------------------------|---------------------------|---------------------------|---------------------------|
| 1    | 8.2249 (68.5%)            | 2.8476 (23.7%)            | 0.6664 (5.5%)             | 0.1294 (1.1%)             |
| 2    | 8.1588 (74.2%)            | 2.4666 (22.4%)            | 0.1814 (1.6%)             | 0.0705 (0.6%)             |
| 3    | 9.6334 (80.3%)            | 1.2394 (10.3%)            | 0.6711 (5.6%)             | 0.3299 (2.7%)             |



**Supplementary Table 7.** Table of significant miRNAs in melanoma.

| miRNA       | Function in melanoma                                                                                          | Reference |
|-------------|---------------------------------------------------------------------------------------------------------------|-----------|
| Let-7a      | Let-7a leads to downregulation of integrin beta-3; Loss of let-7a expression leads to progression of melanoma | 1         |
| Let-7b      | Inhibits anchorage-independent growth of melanoma cells                                                       | 2         |
| Let-7b      | Suppresses BSG expression, melanoma growth and metastasis                                                     | 3         |
| Let-7b      | Increases radiosensitivity of uveal melanoma                                                                  | 4         |
| miR-7-5p    | Inhibits melanoma cell invasiveness                                                                           | 5         |
| miR-21      | Oncogenic miRNA                                                                                               | 6         |
| miR-21      | TIMP3 inhibition; increases invasiveness of melanoma                                                          | 7         |
| miR-21      | Oncogenic                                                                                                     | 8         |
| miR-21      | Oncogenic; redistributes PTEN to the nucleus                                                                  | 9         |
| miR-21      | Associated with melanoma tumor burden                                                                         | 10        |
| miR-21      | Inhibits FBXO11; promotes cell proliferation                                                                  | 11        |
| miR-21      | Promotes metastasis                                                                                           | 12        |
| miR-21      | Negative prognostic factor for patient survival                                                               | 13        |
| miR-21      | Upregulated in melanoma; decreases apoptosis                                                                  | 14        |
| miR-34a     | Targets FLOT2; inhibits WM451 melanoma cell proliferation                                                     | 15        |
| miR-34a     | Downregulates c-Met; decreases uveal melanoma proliferation                                                   | 16        |
| miR-34a     | Increases apoptosis, inhibits survivin                                                                        | 17        |
| miR-34a     | Role in late tumorigenesis; does not appear to be the driver for inherited melanoma                           | 18        |
| miR-34a     | Downregulated in melanoma                                                                                     | 19        |
| miR-34a     | Reduced tumor growth                                                                                          | 20        |
| miR-34a     | Tumor suppressor gene                                                                                         | 21        |
| miR-34b/c   | Suppresses uveal melanoma                                                                                     | 22        |
| miR-34a/b/c | Suppresses metastasis                                                                                         | 23        |
| miR-34b     | Expression leads to reduced invasiveness of A375 and WM1552C cell lines                                       | 24        |
| miR-125b    | Targets MLK3; inhibits cell proliferation                                                                     | 25        |
| miR-125b    | Induces senescence                                                                                            | 26        |
| miR-125b    | Downregulated in lesions with early metastasis                                                                | 27        |
| miR-125b    | Expression is reduced in melanoma                                                                             | 28        |
| miRNA       | Decreases melanoma progression                                                                                | 29        |
| miR-125b    | Increased in metastatic melanoma; lower patient survival                                                      | 30        |
| miR-125b    | Induces senescence in melanoma                                                                                | 31        |
| miR-125b    | Diminishes pigmentation genes and melanin                                                                     | 32        |
| miR-137     | Downregulates MITF and CDK6 and serves as a tumor suppressor in uveal melanoma                                | 33        |
| miR-137     | Targets PAK2; inhibits cell proliferation                                                                     | 34        |
| miR-137     | Targets microphthalmia-associated transcription factor in melanoma cell lines                                 | 35        |

|            |                                                                                                                 |    |
|------------|-----------------------------------------------------------------------------------------------------------------|----|
| miR-137    | Targets CtBP1, inhibits epithelial mesenchymal transition and induces apoptosis                                 | 36 |
| miR-137    | Downregulates oncogenes                                                                                         | 37 |
| miR-137    | Targets steroid receptor co activators SRC1, SRC2, and SRC3 in uveal melanoma; inhibits cell proliferation      | 38 |
| miR-146a   | Plays a role in melanoma pathogenesis                                                                           | 39 |
| miR-146a   | Enhances tumor growth; decreases metastasis                                                                     | 40 |
| miR-146a   | Activates Notch signaling and promotes progression of melanoma                                                  | 41 |
| miR146a    | Prognostic marker for metastasis                                                                                | 42 |
| miR-146a   | Suppresses metastatic brain tumors                                                                              | 43 |
| miR-155    | Loss of this miRNA enhances MDSC function and enhances melanoma cell proliferation                              | 44 |
| miR-155    | Targets SKI; enhances melanoma proliferation                                                                    | 45 |
| miR-155    | Pro-apoptosis                                                                                                   | 46 |
| miR-155    | Enables immune escape                                                                                           | 47 |
| miR-155    | Enhances cell proliferation via MDSC                                                                            | 48 |
| miR-193b   | Associated with poor melanoma survival                                                                          | 49 |
| miR-193b   | Downregulation leads to increased STMN1 and subsequently promotes proliferation and migration of melanoma cells | 50 |
| miR-193b   | Suppress cell proliferation and regulates cyclin D1 in melanoma                                                 | 51 |
| miR-193b   | Downregulation of miR-193b leads to melanoma progression; Regulates mcl-1;                                      | 52 |
| miR-200    | Expressed in melanoma; associated with different mechanisms of invasion                                         | 53 |
| miR-200c   | Inhibits melanoma growth and metastasis in murine model                                                         | 54 |
| miR-200c   | Plays a role in BRAF inhibitor resistant melanoma                                                               | 55 |
| miR-200c   | Expression in CD44 <sup>+</sup> CD133 <sup>+</sup> cells leads to decreased tumor growth                        | 56 |
| miR-200c   | Downregulated in melanoma cell lines and patient samples                                                        | 57 |
| miR-200c   | Downregulates BMI-1; inhibits melanoma proliferation                                                            | 58 |
| miR-203    | Anti-oncogenic; Targets kinesin superfamily protein 5b; regulates melanosome transport                          | 59 |
| miR-203    | A lower expression of this miRNA is associated with a short survival time of patients.                          | 60 |
| miR-203    | Targets E2F3, induces senescence in melanoma cells                                                              | 61 |
| miR-203    | Targets polycomb group gene BMI1; inhibits invasiveness of melanoma                                             | 62 |
| miR-205    | Loss of miRNA-205 is associated with melanoma progression                                                       | 63 |
| miR-205    | Inhibitory effect on bcl-2, ABCA2, ABCA5                                                                        | 64 |
| miR-205    | Tumor suppressor miRNA                                                                                          | 65 |
| miR-205    | Regulates E2F1 and suppresses melanoma proliferation                                                            | 66 |
| miR-205-5p | Curcumin treated melanoma upregulated miR-205-5p; bcl-2 was downregulated in these tumors                       | 67 |

|         |                                                                                                                 |    |
|---------|-----------------------------------------------------------------------------------------------------------------|----|
| miR-210 | Promotes immune escape from cytotoxic T lymphocytes                                                             | 68 |
| miR-210 | Expression leads to enhances MDSC activity; enhances tumor growth                                               | 69 |
| miR-210 | Plasma levels are an indicator of recurrence                                                                    | 70 |
| miR-210 | Transcriptional regulation; repressor of Myc                                                                    | 71 |
| miR-210 | Downregulation leads to resistance to MEK inhibitors                                                            | 72 |
| miR-210 | Upregulated in brain metastasis                                                                                 | 73 |
| miR-211 | Inversely correlated with melanoma bulk                                                                         | 74 |
| miR-211 | Regulator of KCNMA1 expression; reduces melanoma invasion                                                       | 75 |
| miR-211 | Downregulation of this miRNA leads to reduced PRAME protein in melanoma                                         | 76 |
| miR-211 | Associated with increased levels of bcl-2                                                                       | 77 |
| miR-211 | Expression is decreased in melanoma cells                                                                       | 78 |
| miR-211 | Targets microphthalmia-associated transcription factor; associated with melanoma invasion                       | 79 |
| miR-211 | Tumor suppressor                                                                                                | 80 |
| miR-211 | Reduces TGF-beta (TGF-beta plays a role in melanocyte stem cell function)                                       | 81 |
| miR-211 | Downregulation associated with malignant melanoma versus normal nevi.                                           | 82 |
| miR-221 | Predictor of poor 5 year survival                                                                               | 83 |
| miR-221 | Serum levels increased in melanoma patients                                                                     | 84 |
| miR-221 | Tumor marker for melanoma                                                                                       | 85 |
| miR-221 | Inhibits cKit, p27                                                                                              | 86 |
| miR-221 | Melanoma cells treated with interferon-beta led to downregulation of miR-221 and subsequent upregulation of p27 | 87 |

## References

1. Muller DW, Bosserhoff AK. Integrin beta 3 expression is regulated by let-7a miRNA in malignant melanoma. *Oncogene*. 2008;27(52):6698-6706.
2. Schultz J, Lorenz P, Gross G, Ibrahim S, Kunz M. MicroRNA let-7b targets important cell cycle molecules in malignant melanoma cells and interferes with anchorage-independent growth. *Cell Res*. 2008;18(5):549-557.
3. Fu TY, Chang CC, Lin CT, et al. Let-7b-mediated suppression of basigin expression and metastasis in mouse melanoma cells. *Exp Cell Res*. 2011;317(4):445-451.
4. Zhou Y, Zhang L, Fan J, et al. Let-7b overexpression leads to increased radiosensitivity of uveal melanoma cells. *Melanoma Res*. 2015;25(2):119-126.
5. Giles KM, Brown RA, Epis MR, Kalinowski FC, Leedman PJ. miRNA-7-5p inhibits melanoma cell migration and invasion. *Biochem Biophys Res Commun*. 2013;430(2):706-710.
6. Yang CH, Yue J, Sims M, Pfeffer LM. The curcumin analog EF24 targets NF-kappaB and miRNA-21, and has potent anticancer activity in vitro and in vivo. *PLoS One*. 2013;8(8):e71130.
7. Martin del Campo SE, Latchana N, Levine KM, et al. MiR-21 enhances melanoma invasiveness via inhibition of tissue inhibitor of metalloproteinases 3 expression: in vivo effects of MiR-21 inhibitor. *PLoS One*. 2015;10(1):e0115919.
8. Melnik BC. MiR-21: an environmental driver of malignant melanoma? *J Transl Med*. 2015;13:202.
9. Saldanha G, Potter L, Lee YS, Watson S, Shendge P, Pringle JH. MicroRNA-21 expression and its pathogenetic significance in cutaneous melanoma. *Melanoma Res*. 2016;26(1):21-28.
10. Saldanha G, Potter L, Shendge P, et al. Plasma microRNA-21 is associated with tumor burden in cutaneous melanoma. *J Invest Dermatol*. 2013;133(5):1381-1384.
11. Yang CH, Pfeffer SR, Sims M, et al. The oncogenic microRNA-21 inhibits the tumor suppressive activity of FBXO11 to promote tumorigenesis. *J Biol Chem*. 2015;290(10):6037-6046.
12. Yang CH, Yue J, Pfeffer SR, Handorf CR, Pfeffer LM. MicroRNA miR-21 regulates the metastatic behavior of B16 melanoma cells. *J Biol Chem*. 2011;286(45):39172-39178.
13. Jiang L, Lv X, Li J, et al. The status of microRNA-21 expression and its clinical significance in human cutaneous malignant melanoma. *Acta Histochem*. 2012;114(6):582-588.
14. Satzger I, Mattern A, Kuettler U, et al. microRNA-21 is upregulated in malignant melanoma and influences apoptosis of melanocytic cells. *Exp Dermatol*. 2012;21(7):509-514.
15. Liu R, Xie H, Luo C, et al. Identification of FLOT2 as a novel target for microRNA-34a in melanoma. *J Cancer Res Clin Oncol*. 2015;141(6):993-1006.
16. Yan D, Zhou X, Chen X, et al. MicroRNA-34a inhibits uveal melanoma cell proliferation and migration through downregulation of c-Met. *Invest Ophthalmol Vis Sci*. 2009;50(4):1559-1565.
17. Chen Y, Zhu X, Zhang X, Liu B, Huang L. Nanoparticles modified with tumor-targeting scFv deliver siRNA and miRNA for cancer therapy. *Mol Ther*. 2010;18(9):1650-1656.
18. Cozzolino AM, Pedace L, Castori M, et al. Analysis of the miR-34a locus in 62 patients with familial cutaneous melanoma negative for CDKN2A/CDK4 screening. *Fam Cancer*. 2012;11(2):201-208.
19. Satzger I, Mattern A, Kuettler U, et al. MicroRNA-15b represents an independent prognostic parameter and is correlated with tumor cell proliferation and apoptosis in malignant melanoma. *Int J Cancer*. 2010;126(11):2553-2562.

20. Shi S, Han L, Deng L, et al. Dual drugs (microRNA-34a and paclitaxel)-loaded functional solid lipid nanoparticles for synergistic cancer cell suppression. *J Control Release*. 2014;194:228-237.
21. Lodygin D, Tarasov V, Epanchintsev A, et al. Inactivation of miR-34a by aberrant CpG methylation in multiple types of cancer. *Cell Cycle*. 2008;7(16):2591-2600.
22. Dong F, Lou D. MicroRNA-34b/c suppresses uveal melanoma cell proliferation and migration through multiple targets. *Mol Vis*. 2012;18:537-546.
23. Yamazaki H, Chijiwa T, Inoue Y, et al. Overexpression of the miR-34 family suppresses invasive growth of malignant melanoma with the wild-type p53 gene. *Exp Ther Med*. 2012;3(5):793-796.
24. Mazar J, Khaitan D, DeBlasio D, et al. Epigenetic regulation of microRNA genes and the role of miR-34b in cell invasion and motility in human melanoma. *PLoS One*. 2011;6(9):e24922.
25. Zhang J, Lu L, Xiong Y, et al. MLK3 promotes melanoma proliferation and invasion and is a target of microRNA-125b. *Clin Exp Dermatol*. 2014;39(3):376-384.
26. Glud M, Manfe V, Biskup E, et al. MicroRNA miR-125b induces senescence in human melanoma cells. *Melanoma Res*. 2011;21(3):253-256.
27. Glud M, Rossing M, Hother C, et al. Downregulation of miR-125b in metastatic cutaneous malignant melanoma. *Melanoma Res*. 2010;20(6):479-484.
28. Kappelmann M, Kuphal S, Meister G, Vardimon L, Bosserhoff AK. MicroRNA miR-125b controls melanoma progression by direct regulation of c-Jun protein expression. *Oncogene*. 2013;32(24):2984-2991.
29. Alegre E, Sanmamed MF, Rodriguez C, Carranza O, Martin-Algarra S, Gonzalez A. Study of circulating microRNA-125b levels in serum exosomes in advanced melanoma. *Arch Pathol Lab Med*. 2014;138(6):828-832.
30. Rambow F, Bechadergue A, Luciani F, et al. Regulation of melanoma progression through the TCF4/miR-125b/NEDD9 cascade. *J Invest Dermatol*. 2016.
31. Nyholm AM, Lerche CM, Manfe V, et al. miR-125b induces cellular senescence in malignant melanoma. *BMC Dermatol*. 2014;14:8.
32. Kim KH, Bin BH, Kim J, et al. Novel inhibitory function of miR-125b in melanogenesis. *Pigment Cell Melanoma Res*. 2014;27(1):140-144.
33. Chen X, Wang J, Shen H, et al. Epigenetics, microRNAs, and carcinogenesis: functional role of microRNA-137 in uveal melanoma. *Invest Ophthalmol Vis Sci*. 2011;52(3):1193-1199.
34. Hao S, Luo C, Abukiwan A, et al. miR-137 inhibits proliferation of melanoma cells by targeting PAK2. *Exp Dermatol*. 2015;24(12):947-952.
35. Bemis LT, Chen R, Amato CM, et al. MicroRNA-137 targets microphthalmia-associated transcription factor in melanoma cell lines. *Cancer Res*. 2008;68(5):1362-1368.
36. Deng Y, Deng H, Bi F, et al. MicroRNA-137 targets carboxyl-terminal binding protein 1 in melanoma cell lines. *Int J Biol Sci*. 2011;7(1):133-137.
37. Luo C, Tetteh PW, Merz PR, et al. miR-137 inhibits the invasion of melanoma cells through downregulation of multiple oncogenic target genes. *J Invest Dermatol*. 2013;133(3):768-775.
38. Eedunuri VK, Rajapakshe K, Fiskus W, et al. miR-137 Targets p160 Steroid Receptor Coactivators SRC1, SRC2, and SRC3 and Inhibits Cell Proliferation. *Mol Endocrinol*. 2015;29(8):1170-1183.
39. Yamashita J, Iwakiri T, Fukushima S, et al. The rs2910164 G>C polymorphism in microRNA-146a is associated with the incidence of malignant melanoma. *Melanoma Res*. 2013;23(1):13-20.

40. Raimo M, Orso F, Grassi E, et al. miR-146a Exerts Differential Effects on Melanoma Growth and Metastatization. *Mol Cancer Res*. 2016. epub ahead of print. molcanres 0425.2015
41. Forloni M, Dogra SK, Dong Y, et al. miR-146a promotes the initiation and progression of melanoma by activating Notch signaling. *Elife*. 2014;3:e01460.
42. Barbai T, Fejos Z, Puskas LG, Timar J, Raso E. The importance of microenvironment: the role of CCL8 in metastasis formation of melanoma. *Oncotarget*. 2015;6(30):29111-29128.
43. Hwang SJ, Seol HJ, Park YM, et al. MicroRNA-146a suppresses metastatic activity in brain metastasis. *Mol Cells*. 2012;34(3):329-334.
44. Wang J, Yu F, Jia X, et al. MicroRNA-155 deficiency enhances the recruitment and functions of myeloid-derived suppressor cells in tumor microenvironment and promotes solid tumor growth. *Int J Cancer*. 2015;136(6):E602-613.
45. Levati L, Pagani E, Romani S, et al. MicroRNA-155 targets the SKI gene in human melanoma cell lines. *Pigment Cell Melanoma Res*. 2011;24(3):538-550.
46. Levati L, Alvino E, Pagani E, et al. Altered expression of selected microRNAs in melanoma: antiproliferative and proapoptotic activity of miRNA-155. *Int J Oncol*. 2009;35(2):393-400.
47. Arts N, Cane S, Hennequart M, et al. microRNA-155, induced by interleukin-1ss, represses the expression of microphthalmia-associated transcription factor (MITF-M) in melanoma cells. *PLoS One*. 2015;10(4):e0122517.
48. Chen S, Wang L, Fan J, et al. Host miR155 promotes tumor growth through a myeloid-derived suppressor cell-dependent mechanism. *Cancer Res*. 2015;75(3):519-531.
49. Caramuta S, Egyhazi S, Rodolfo M, et al. MicroRNA expression profiles associated with mutational status and survival in malignant melanoma. *J Invest Dermatol*. 2010;130(8):2062-2070.
50. Chen J, Abi-Daoud M, Wang A, et al. Stathmin 1 is a potential novel oncogene in melanoma. *Oncogene*. 2013;32(10):1330-1337.
51. Chen J, Feilotter HE, Pare GC, et al. MicroRNA-193b represses cell proliferation and regulates cyclin D1 in melanoma. *Am J Pathol*. 2010;176(5):2520-2529.
52. Chen J, Zhang X, Lentz C, et al. miR-193b Regulates Mcl-1 in Melanoma. *Am J Pathol*. 2011;179(5):2162-2168.
53. Elson-Schwab I, Lorentzen A, Marshall CJ. MicroRNA-200 family members differentially regulate morphological plasticity and mode of melanoma cell invasion. *PLoS One*. 2010;5(10).
54. Wang X, He X, Zhao F, et al. Regulation gene expression of miR200c and ZEB1 positively enhances effect of tumor vaccine B16F10/GPI-IL-21 on inhibition of melanoma growth and metastasis. *J Transl Med*. 2014;12:68.
55. Liu S, Tetzlaff MT, Wang T, et al. miR-200c/Bmi1 axis and epithelial-mesenchymal transition contribute to acquired resistance to BRAF inhibitor treatment. *Pigment Cell Melanoma Res*. 2015;28(4):431-441.
56. Dou J, He XF, Cao WH, et al. Overexpression of microRna-200c in CD44+CD133+ CSCS inhibits the cellular migratory and invasion as well as tumorigenicity in mice. *Cell Mol Biol (Noisy-le-grand)*. 2013;Suppl 59:OL1861-1868.
57. Philippidou D, Schmitt M, Moser D, et al. Signatures of microRNAs and selected microRNA target genes in human melanoma. *Cancer Res*. 2010;70(10):4163-4173.
58. Liu S, Tetzlaff MT, Cui R, Xu X. miR-200c inhibits melanoma progression and drug resistance through down-regulation of BMI-1. *Am J Pathol*. 2012;181(5):1823-1835.
59. Noguchi S, Kumazaki M, Yasui Y, Mori T, Yamada N, Akao Y. MicroRNA-203 regulates melanosome transport and tyrosinase expression in melanoma cells by targeting kinesin superfamily protein 5b. *J Invest Dermatol*. 2014;134(2):461-469.

60. Wang K, Zhang ZW. Expression of miR-203 is decreased and associated with the prognosis of melanoma patients. *Int J Clin Exp Pathol.* 2015;8(10):13249-13254.
61. Noguchi S, Mori T, Otsuka Y, et al. Anti-oncogenic microRNA-203 induces senescence by targeting E2F3 protein in human melanoma cells. *J Biol Chem.* 2012;287(15):11769-11777.
62. Chang X, Sun Y, Han S, Zhu W, Zhang H, Lian S. MiR-203 inhibits melanoma invasive and proliferative abilities by targeting the polycomb group gene BMI1. *Biochem Biophys Res Commun.* 2015;456(1):361-366.
63. Liu S, Tetzlaff MT, Liu A, Liegl-Atzwanger B, Guo J, Xu X. Loss of microRNA-205 expression is associated with melanoma progression. *Lab Invest.* 2012;92(7):1084-1096.
64. Alla V, Kowtharapu BS, Engelmann D, et al. E2F1 confers anticancer drug resistance by targeting ABC transporter family members and Bcl-2 via the p73/DNp73-miR-205 circuitry. *Cell Cycle.* 2012;11(16):3067-3078.
65. Hanna JA, Hahn L, Agarwal S, Rimm DL. In situ measurement of miR-205 in malignant melanoma tissue supports its role as a tumor suppressor microRNA. *Lab Invest.* 2012;92(10):1390-1397.
66. Dar AA, Majid S, de Semir D, Nosrati M, Bezrookove V, Kashani-Sabet M. miRNA-205 suppresses melanoma cell proliferation and induces senescence via regulation of E2F1 protein. *J Biol Chem.* 2011;286(19):16606-16614.
67. Dahmke IN, Backes C, Rudzitis-Auth J, et al. Curcumin intake affects miRNA signature in murine melanoma with mmu-miR-205-5p most significantly altered. *PLoS One.* 2013;8(12):e81122.
68. Noman MZ, Buart S, Romero P, et al. Hypoxia-inducible miR-210 regulates the susceptibility of tumor cells to lysis by cytotoxic T cells. *Cancer Res.* 2012;72(18):4629-4641.
69. Noman MZ, Janji B, Hu S, et al. Tumor-Promoting Effects of Myeloid-Derived Suppressor Cells Are Potentiated by Hypoxia-Induced Expression of miR-210. *Cancer Res.* 2015;75(18):3771-3787.
70. Ono S, Oyama T, Lam S, Chong K, Foshag LJ, Hoon DS. A direct plasma assay of circulating microRNA-210 of hypoxia can identify early systemic metastasis recurrence in melanoma patients. *Oncotarget.* 2015;6(9):7053-7064.
71. Zhang Z, Sun H, Dai H, et al. MicroRNA miR-210 modulates cellular response to hypoxia through the MYC antagonist MNT. *Cell Cycle.* 2009;8(17):2756-2768.
72. Bhadury J, Einarsdottir BO, Podraza A, et al. Hypoxia-regulated gene expression explains differences between melanoma cell line-derived xenografts and patient-derived xenografts. *Oncotarget.* 2016.
73. Alsidawi S, Malek E, Driscoll JJ. MicroRNAs in brain metastases: potential role as diagnostics and therapeutics. *Int J Mol Sci.* 2014;15(6):10508-10526.
74. Babapoor S, Horwich M, Wu R, et al. microRNA in situ hybridization for miR-211 detection as an ancillary test in melanoma diagnosis. *Mod Pathol.* 2016.
75. Mazar J, DeYoung K, Khaitan D, et al. The regulation of miRNA-211 expression and its role in melanoma cell invasiveness. *PLoS One.* 2010;5(11):e13779.
76. Sakurai E, Maesawa C, Shibasaki M, et al. Downregulation of microRNA-211 is involved in expression of preferentially expressed antigen of melanoma in melanoma cells. *Int J Oncol.* 2011;39(3):665-672.
77. De Luca T, Pelosi A, Trisciuglio D, et al. miR-211 and MITF modulation by Bcl-2 protein in melanoma cells. *Mol Carcinog.* 2015.
78. Boyle GM, Woods SL, Bonazzi VF, et al. Melanoma cell invasiveness is regulated by miR-211 suppression of the BRN2 transcription factor. *Pigment Cell Melanoma Res.* 2011;24(3):525-537.

79. Bell RE, Khaled M, Netanel D, et al. Transcription factor/microRNA axis blocks melanoma invasion program by miR-211 targeting NUA1. *J Invest Dermatol.* 2014;134(2):441-451.
80. Levy C, Khaled M, Iliopoulos D, et al. Intronic miR-211 assumes the tumor suppressive function of its host gene in melanoma. *Mol Cell.* 2010;40(5):841-849.
81. Dai X, Rao C, Li H, et al. Regulation of pigmentation by microRNAs: MITF-dependent microRNA-211 targets TGF-beta receptor 2. *Pigment Cell Melanoma Res.* 2015;28(2):217-222.
82. Jukic DM, Rao UN, Kelly L, et al. MicroRNA profiling analysis of differences between the melanoma of young adults and older adults. *J Transl Med.* 2010;8:27.
83. Li P, He QY, Luo CQ, Qian LY. Circulating miR-221 expression level and prognosis of cutaneous malignant melanoma. *Med Sci Monit.* 2014;20:2472-2477.
84. Kanemaru H, Fukushima S, Yamashita J, et al. The circulating microRNA-221 level in patients with malignant melanoma as a new tumor marker. *J Dermatol Sci.* 2011;61(3):187-193.
85. Inada T, Fukushima S, Murai M, et al. Hair shaft miRNA-221 levels as a new tumor marker of malignant melanoma. *J Dermatol.* 2015;42(2):198-201.
86. Igoucheva O, Alexeev V. MicroRNA-dependent regulation of cKit in cutaneous melanoma. *Biochem Biophys Res Commun.* 2009;379(3):790-794.
87. Das SK, Sokhi UK, Bhutia SK, et al. Human polynucleotide phosphorylase selectively and preferentially degrades microRNA-221 in human melanoma cells. *Proc Natl Acad Sci U S A.* 2010;107(26):11948-11953.



Supplementary Figure 1.

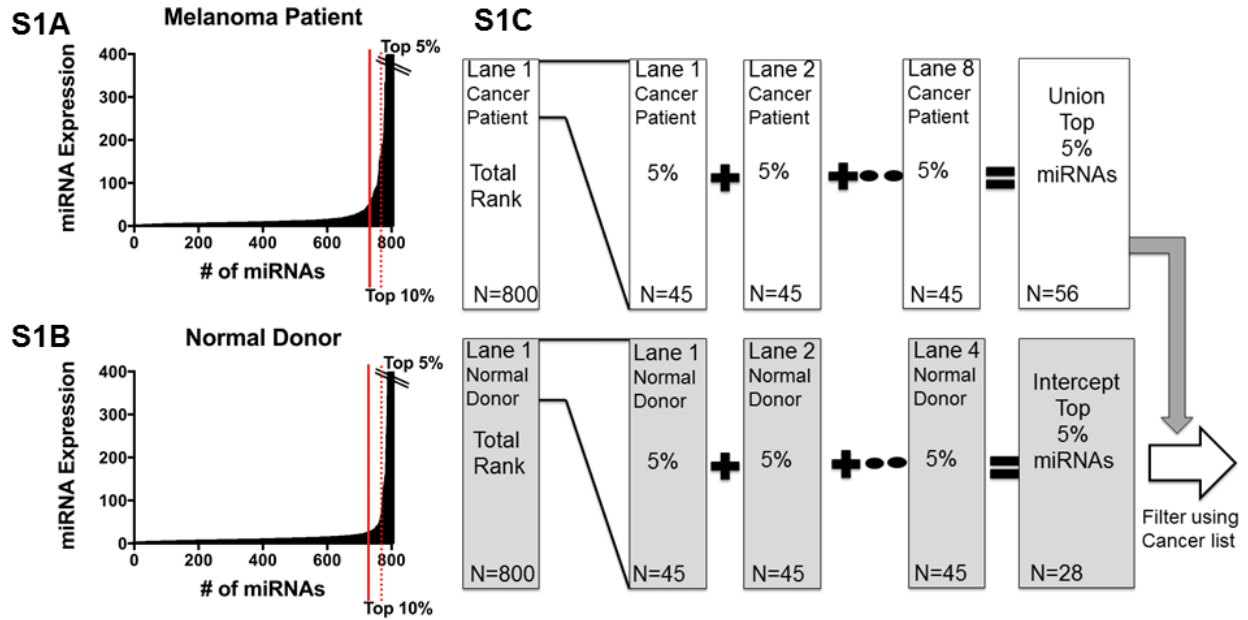

The process for selecting down-regulated miRNAs is illustrated for chip 1. First, the 800 miRNAs identified by NanoString in each lane (one lane per patient) were ordered from highest to lowest expression (**ranked**). S1A) A list of the top 5% (45) of the miRNAs present in the plasma of a cancer patient in chip 1 was generated. S1B) A list of the top 5% (45) of the miRNAs that were present in the plasma of the first normal control donor was generated. S1C) The process is repeated for each of the 8 patient samples and 4 normal donors, and thus 12 such lists were created. The miRNAs that were present in any of the top 5% of the patient lists (8 lists, N = 56; union of the patient lists) were removed from the miRNAs that were present in the top 5% of highly expressing miRNAs in all the normal donor lists (8 lists, N = 28; intercept of the normal donor lists) to generate a list consisting of 15 down-regulated miRNAs in patient samples. Our rank-based method starts the selection of down-regulated miRNAs in a convenient feature list size of the top 5% of miRNAs and repeats the process of finding down-regulated miRNAs by expanding the feature list size (by 5%) through multiple iterations until the

most number of down-regulated miRNAs are selected that have a nonrandom false positive rate. For the first chip, this cut off is 5% with a false positive rate  $< 0.01$ . A similar process was utilized to obtain the up-regulated miRNAs in the melanoma and pancreatic cancer tumor bank cohorts.
